1 **Reactivating Positive Personality Traits During Sleep Impacts Self-Evaluative Memories**

2 Ziqing Yao<sup>1</sup>, Tao Xia<sup>1</sup>, Zhiguo Zhang<sup>2</sup>, Xuanyi Lin<sup>1</sup>,

3 Pengmin Qin<sup>3</sup>, Yina Ma<sup>4,5</sup> & Xiaoqing Hu<sup>1,6,7\*</sup>

4 1 Department of Psychology, The University of Hong Kong, Hong Kong SAR, China

5 2 Institute of Computing and Intelligence, Harbin Institute of Technology, Shenzhen,  
6 China,

7 Peng Cheng Laboratory, Shenzhen, Guangdong, 518055, China,

8 Marshall Laboratory of Biomedical Engineering, Shenzhen, Guangdong, 518060, China

9 3 Key Laboratory of Brain, Cognition and Education Sciences, Ministry of Education,  
10 School of Psychology, Center for Studies of Psychological Application, and

11 Guangdong Key Laboratory of Mental Health and Cognitive Science, South China

12 Normal University, Guangzhou, Guangdong 510631, China

13 4 State Key Laboratory of Cognitive Neuroscience and Learning, IDG/McGovern  
14 Institute for Brain Research, Beijing Key Laboratory of Brain Imaging and Connectomics,

15 Beijing Normal University, Beijing, China

16 5 Chinese Institute for Brain Research, Beijing, China

17 6 The State Key Laboratory of Brain and Cognitive Sciences,

18 The University of Hong Kong, Hong Kong SAR, China

19 7 HKU, Shenzhen Institute of Research and Innovation, Shenzhen, China

20

21 Corresponding Author:

22 Xiaoqing Hu,

23 Department of Psychology, The University of Hong Kong,

24 Pokfulam, Hong Kong SAR, China.

25 E-mail: xiaoqinghu@hku.hk

26 Phone: (852) 3917-2291

27

28  
29  
30  
31  
32  
33  
34  
35  
36  
37  
38  
39  
40  
41  
42  
43  
44  
45  
46  
47

## Abstract

People tend to view themselves through rose-tinted glasses, as evidenced by preferential recall of positive personality traits. We asked whether reactivating positive personality traits during sleep could enhance peoples' positive self-evaluative memories. After a baseline self-referential encoding task in which participants endorsed positive and negative traits as self-descriptive, participants were trained to give timely responses to positive traits in a cue-approach training (CAT) task. Once participants had entered slow-wave sleep during a subsequent nap, half of the trained positive traits were unobtrusively re-played to them to promote consolidation (targeted memory reactivation, TMR). Participants completed free-recall tasks about self-descriptive traits to measure their self-evaluative memories. Our findings revealed that TMR prioritized the recall of positive traits that were strongly memorized before sleep, while impairing the recall of intermediate traits. The results suggest pre-TMR self-evaluative memory strength modulated the TMR benefits. Sleep EEG analyses revealed that compared with weak/intermediate/control traits, re-playing strongly memorized traits during sleep elicited greater sigma power changes, which likely reflect preferential memory reactivation. Our results demonstrate the potential implication of wakeful cue-approach training and sleep-based memory reactivation in strengthening positive self-evaluative memories.

***Keywords: targeted memory reactivation, sleep, cue-approach training, self-evaluation, positivity bias***

## 48 **Introduction**

49 People view themselves through rose-tinted lenses; when presented with positive and negative  
50 personality traits, people not only tend to endorse positive traits more frequently, they also  
51 preferentially remember positive rather than negative traits<sup>1-4</sup>. This positive self-evaluative  
52 memory bias<sup>5</sup> may safeguard mental wellness, thereby reducing feelings of worthlessness and  
53 depressive symptoms in individuals especially when faced with self-threatening information<sup>6</sup>.  
54 Despite its importance<sup>7</sup>, few studies have examined how positive self-evaluative memories can  
55 be enhanced. To expand this seldom-explored area of research, we hypothesized that one  
56 strategy to enhance positive self-evaluative memories is to increase the salience and memory  
57 accessibility of positive traits when people describe themselves. To this end, we tested the  
58 efficacy of two recently developed paradigms to enhance positive self-evaluative memories: (1) a  
59 cued-approach training (CAT<sup>8</sup>) task that increases stimulus salience via approach motor training,  
60 and (2) sleep-based targeted memory reactivation (TMR<sup>9</sup>) that promotes memory consolidation  
61 during post-training sleep.

62 CAT is a behavioral training task used to induce choice and preference changes for given  
63 stimuli in the absence of external reinforcement<sup>8,10,11</sup>. Specifically, when people are cued to  
64 manually respond to a stimulus (e.g., ‘Go’), they are more likely to prefer and more frequently  
65 choose Go stimuli over NoGo stimuli despite having comparable initial preferences for Go and  
66 NoGo stimuli. Previous research has used CAT to change individuals’ evaluation and choices of  
67 low-level stimuli such as snacks, meaningless fractals, and positive images from the International  
68 Affective Picture System (IAPS)<sup>10</sup>. However, it remains unknown whether CAT can change  
69 individuals’ evaluation of high-level personality traits. Inspired by CAT research, and to address  
70 this gap, we examined whether prompting participants to respond to positive self-evaluative

71 traits (e.g., ‘brilliant’, ‘conscientious’, ‘brave’) could enhance positive self-evaluative memories  
72 and self-evaluation.

73 Sleep is pivotal in memory consolidation<sup>12,13</sup>. A plethora of research suggests that post-  
74 learning sleep contributes to the stabilization of newly acquired memories, mediated by repeated  
75 memory reactivation particularly during non-rapid eye movement (NREM) sleep<sup>9,13–15</sup>. Notably,  
76 memory reactivation not only occurs spontaneously, but can also be initiated via re-playing  
77 memory-related sensory cues to individuals during post-learning NREM sleep. TMR has been  
78 shown to promote memory consolidation for cued memories, as evidenced by improved cued  
79 (versus uncued) memory performance in post-sleep tests<sup>16–22</sup> (see Hu et al.<sup>23</sup> for a meta-analysis  
80 on TMR). However, it remains unclear whether TMR can consolidate highly self-referential  
81 memories such as personality traits. The present study aimed to investigate whether TMR could  
82 enhance positive self-evaluative memories via repeatedly reactivating positive-personality traits  
83 during sleep.

84 While mounting evidence suggests that sleep and TMR promote memory consolidation,  
85 not all memories are equally benefited<sup>18,24,25</sup>. A range of factors influence sleep-mediated  
86 memory consolidation and TMR effect, such as pre-TMR memory strength (strong or weak) and  
87 motivational salience (high versus low arousal, reward versus non-reward)<sup>26–29</sup>. Relatedly, in  
88 self-evaluation, people tend to have stronger memories of highly self-descriptive traits compared  
89 to less self-descriptive items<sup>30,31</sup>. Given that highly self-descriptive traits are preferentially  
90 encoded and that they are highly motivationally salient, we hypothesized that TMR benefits  
91 would be more evident among positive traits that were strongly endorsed and better memorized  
92 than traits that were poorly memorized or less likely to be endorsed before TMR.

93           We ask whether we could enhance participants’ positive self-evaluative memories via  
94 reactivating CAT-trained, positive trait memories during sleep (see Figure. 1a). In a self-  
95 referential encoding task (SRET), participants viewed a series of positive and negative  
96 personality traits and rated the extent to which they could be applied to themselves, ranging from  
97 “extremely inaccurate” to “extremely accurate” (see Figure. 1b). In the subsequent CAT,  
98 participants manually responded to certain positive traits, presented visually on a screen and  
99 aurally through speakers, see Figure. 1c). Our key experimental manipulation happened during  
100 the post-CAT nap phase; during slow-wave sleep, the experimenter re-played half the previous  
101 CAT-trained positive traits to participants to reactivate memories. Upon waking, participants  
102 completed a free-recall task to assess the TMR’s impact on their self-evaluative memories as  
103 well as a probe task to assess its effect on self-evaluative preferences. In addition to assessing  
104 TMR’s immediate effect, we invited participants to come back to the lab one week after to  
105 examine TMR’s potential long-term effects.

106 **Figure 1**

107 *An Overview of Experimental Design and Main Tasks*

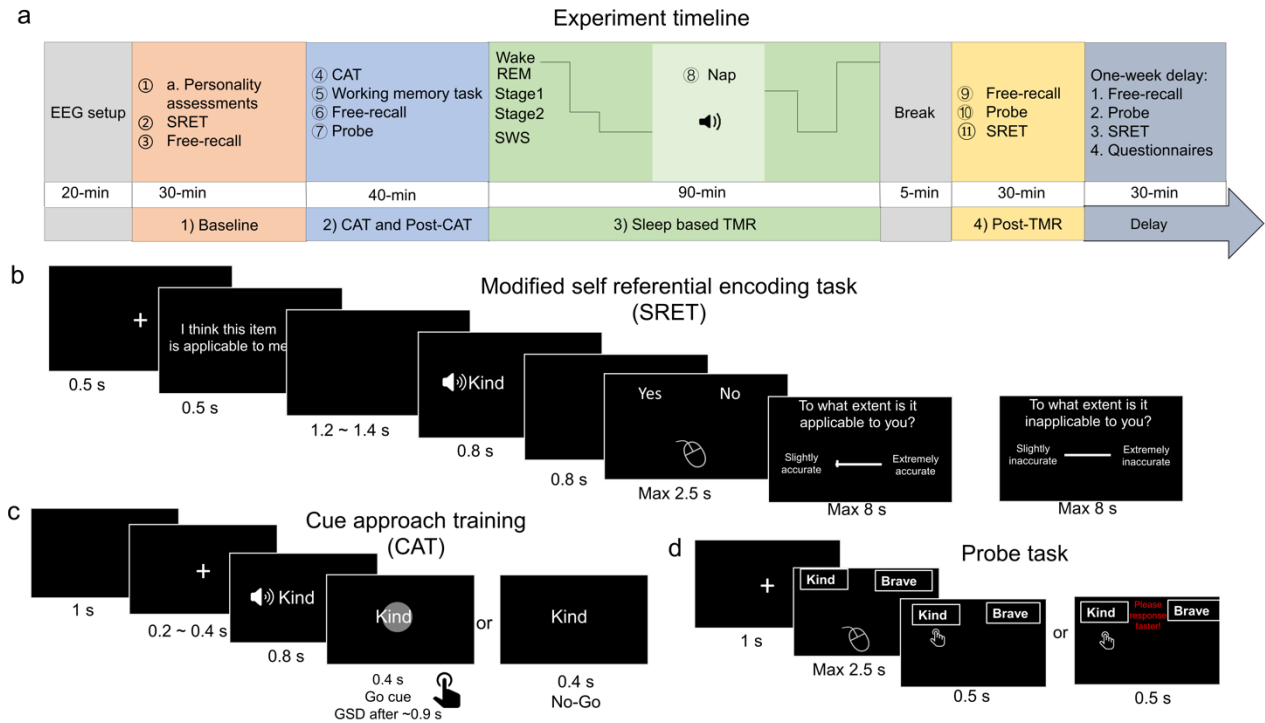

108

109 *Note.* (a) Task flow demonstrating the four task phases used following arrival, consent-form  
 110 signing, and EEG setup, including baseline tests (phase 1), CAT and post-CAT/pre-TMR tests  
 111 (phase 2), sleep-based TMR (phase 3), and post-TMR tests (phase 4). (b) Modified SRET, in  
 112 which participants rated how accurately specific traits reflected themselves, followed by a self-  
 113 evaluative memory free-recall task. (c) Exemplar trial of CAT, in which participants responded  
 114 to positive traits presented visually and aurally. (d) Probe test, in which participants were  
 115 presented with Go and NoGo trait-word pairings and asked to select the word from the pair that  
 116 was most self-descriptive (see Methods section for a full description of the procedure and  
 117 experimental tasks).

118 **Results**

119 **Behavioral results**

120 We measured the following outcomes related to self-evaluation: (1) self-evaluative memories,  
 121 via free-recall of personality trait in the free-recall task; (2) self-evaluative preferences, via

122 preference choices among two traits in the probe task; and (3) self-evaluative judgements, via  
123 endorsement judgements and ratings of personality traits in the SRET.

### 124 *Evidence of Self-Evaluative Positivity Bias at Baseline Session*

125 Consistent with previous research that examined self-evaluation in healthy populations<sup>32</sup>,  
126 participants endorsed more positive than negative traits as self-descriptive ( $t = -11.1$   $p < 0.001$ )  
127 and were faster at endorsing positive traits ( $t = 2.30$   $p = 0.028$ ).

128 In the baseline recall task (1st recall), participants recalled more positive than negative  
129 traits, indicating a positive self-evaluative memory bias ( $t = 8.42$ ,  $p < 0.001$ ). Participants who  
130 showed a larger positivity bias also reported a lower score from the Beck Depression Inventory-  
131 II (BDI) ( $r = -0.68$ ,  $p < 0.001$ ; Figure. 2a), replicating the relationship between self-positivity  
132 bias and depressive symptoms<sup>33</sup>.

133 Together, via successfully replicating the self-evaluation positivity bias, we confirmed  
134 the validity of using SRET and the trait free-recall task to assess self-evaluation and self-  
135 evaluative memories.

### 136 *Effects of CAT and TMR on Self-Evaluative Memories*

137 Given that we primarily focused on positive self-evaluation and self-evaluative memories, we  
138 presented results on positive traits using (generalized) linear mixed models ((G)LMM) to include  
139 participants and/or traits as random effects during post-CAT, post-TMR, and delay tasks.

140 To test the CAT effect (i.e., Go versus NoGo) on the recall of positive self-evaluative  
141 memories while controlling for baseline recall performance, we ran (G)LMM using CAT (Go  
142 versus NoGo) and pre-CAT recall (recalled versus not recalled) as fixed effect, using participant  
143 factor as the random effect to predict post-CAT recall. We analyzed whether a trait was recalled  
144 or not, and if recalled, its recall order (the earlier, the better). Results showed a significant

145 interaction between baseline recall (1st recall) and CAT on post-CAT recall order,  $F(1, 1073.7)$   
146 = 4.04,  $p = 0.045$ . However, the post-hoc comparison did not reach significance. No other  
147 significant effects were found for recall percentage during the post-CAT recall task, all  $ps > 0.1$ .  
148 These results suggest CAT alone might not be capable of changing self-evaluative memories.

149 Next, we focused on the TMR effect (cued vs. uncued) by examining post-TMR recall  
150 performance (3rd recall), again using recall outcome and recall order. To understand how pre-  
151 sleep memory strength might influence TMR effects, we categorized each trait into one of three  
152 conditions (weak, intermediate, and strong) based on recall from the baseline (1st) and post-CAT  
153 (2nd) tasks. A trait would be categorized as weak if it was not recalled in neither baseline and  
154 post-CAT tests, intermediate if it was recalled only once in either baseline or post-CAT tests, and  
155 strong if it was recalled in both tests. Because the categorization of traits depended on the recall  
156 performance of baseline and post-CAT tests, 17 participants were excluded from subsequent  
157 analyses due to lack of traits assigned to one or more memory-strength conditions. This left us  
158 with 18 participants. Given the small sample size, we regarded the following analyses as  
159 exploratory, and the results should be interpreted with caution. The number of traits assigned to  
160 weak, intermediate, and strong conditions are presented in Table 1.

161 **Table 1**

162 Number of traits in each pre-memory strength condition (mean  $\pm$ SEM).

| Cue condition | Weak             | Intermediate    | Strong          |
|---------------|------------------|-----------------|-----------------|
| Go-cued       | 10.16 $\pm$ 0.35 | 3.00 $\pm$ 0.29 | 1.83 $\pm$ 0.22 |
| Go-uncued     | 9.88 $\pm$ 0.37  | 3.22 $\pm$ 0.34 | 1.88 $\pm$ 0.23 |
| NoGo          | 21.61 $\pm$ 0.52 | 4.83 $\pm$ 0.40 | 3.56 $\pm$ 0.45 |

163



164 For the binary recall outcome (i.e., recalled or not), we found a significant interaction  
165 effect between TMR and pre-TMR memory strength,  $\chi^2(4) = 12.28, p = 0.015$ . Post-hoc results  
166 showed that cueing intermediate traits impaired their later recall,  $\beta = -1.15, SE = 0.45, p = 0.027$ ,  
167 but there was no significant cueing effect for strong traits,  $\beta = 1.34, SE = 0.75, p = 0.17$ , or weak  
168 traits,  $\beta = 0.30, SE = 0.37, p = 0.70$  (see Figure. 2b). No other significant contrasts were found,  
169  $ps > 0.1$ .

170 For recalled order, we found a significant interaction between TMR and pre-TMR  
171 memory strength,  $F(4, 1065.7) = 7.22, p < 0.001$ . Follow-up analyses showed that TMR cueing  
172 prioritized the recall of strong traits, as evidenced by earlier recall order for Go-cued rather than  
173 Go-uncued traits,  $\beta = -0.61, SE = 0.20, p < 0.01$ , and also marginally than NoGo items,  $\beta = -$   
174  $0.42, SE = 0.18, p = 0.053$  (see Figure. 2c). In contrast, for intermediate traits, TMR cueing  
175 rendered the Go-cued traits to be recalled later than Go-uncued traits,  $\beta = 0.69, SE = 0.16, p <$   
176  $0.001$ , while Go-uncued traits were recalled earlier than NoGo traits,  $\beta = -0.44, SE = 0.14, p <$   
177  $0.01$ . No other significant results were found ( $ps > 0.1$ ). Thus, TMR prioritized the accessibility  
178 of strong traits at the cost of intermediate traits, as evidenced by their recall priority. Regarding  
179 the delay test, while it is worthwhile to examine TMR's long-term effect in the one-week delay  
180 tests, we were unable to perform the analyses given the number of traits that were recalled in the  
181 delay task was too few.

182 Lastly, to ensure that pre-TMR memory strength aligned with self-referential processing,  
183 we compared the baseline endorsement rating (obtained from the baseline SRET, see Figure. 1b)  
184 for weak, intermediate, and strong traits. We found that strong and intermediate traits had  
185 significantly higher endorsement ratings (i.e., more self-descriptive) than weak traits (all  $ps <$   
186  $0.01$ ), but no difference between intermediate and strong traits ( $p = 0.596$ ). This suggests pre-

187 TMR memory strength reflected the extent to which participants would endorse traits as self-  
188 descriptive.

## 189 **Figure 2**

190 *The effect of TMR Conditions, Pre-TMR Memory Strength on Post-TMR Recall Performance*

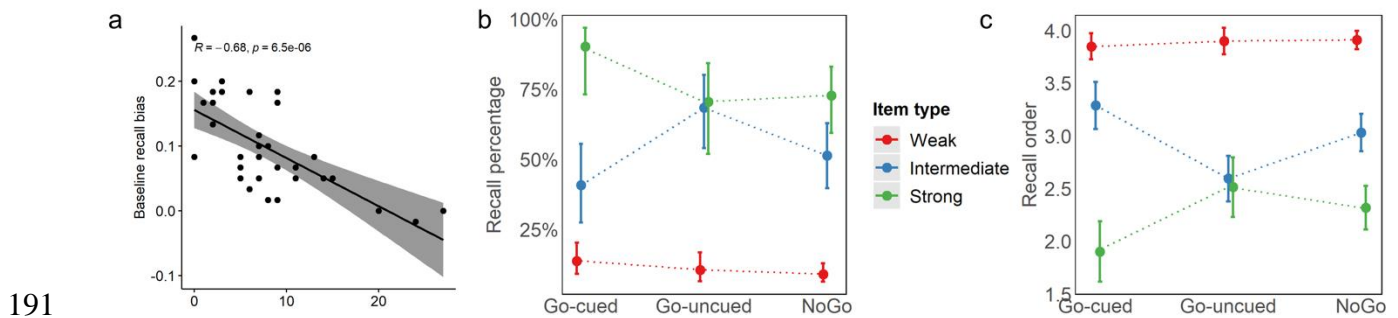

192 *Note.* (a) Pearson Correlation Between BDI Scores and Baseline Self-Positivity Bias. Baseline  
193 recall bias was calculated by the number of endorsed and recalled positive words divided by the  
194 number of endorsed words during the baseline recall task. BDI scores were negatively correlated  
195 with baseline recall bias. (b) Recall percentage for positive traits. (c) Recall order (via a log  
196 transformation). Error bars indicate 95% confidence intervals (CIs).

197

## 198 *Effects of CAT and TMR on Self-Evaluation Preferences*

199 We next assessed self-evaluation preferences towards positive traits using the probe task (see  
200 Figure. 1d). On each trial of the probe task, participants were presented with a pair of traits, each  
201 containing one Go trait and one NoGo trait (with Go and NoGo traits matched for baseline  
202 endorsement level) and were asked to select the trait which better described themselves. More  
203 specifically, we followed previous CAT research to sort Go–NoGo (GNG) pairs into low- and  
204 high-rating pairs<sup>8,10</sup>. We then used a series of GLMMs to analyze preference changes (see  
205 Methods). Immediately after CAT, participants were more likely to choose Go traits for low-  
206 rating GNG pairs (Go choices: 55.7%, SE = 2.2%,  $Z = 2.60$ ,  $p = 0.005$ ) but not for high-rating  
207 GNG pairs (mean proportion = 51.5%, SE = 2.3%,  $Z = 0.66$ ,  $p = 0.254$ ). The percentage of Go

208 trait choices was not significantly different between high- versus low-rating pairs ( $Z = 1.55$ ,  $p =$   
209 0.120).

210 We next examined the immediate effect of TMR in the post-TMR probe task. We found  
211 no TMR effects (i.e., choice proportion Go-cued > Go-uncued traits) for either low- or high-  
212 rating pairs. Participants were more likely to choose Go-cued and Go-uncued traits than NoGo  
213 traits for low-rating pairings: Go-cued: 55.5%, SE = 3.1%,  $Z = 1.81$ ,  $p = 0.035$ ; Go-uncued:  
214 56.9%, SE = 3.1%,  $Z = 2.19$ ,  $p = 0.014$ . This effect was not significant for high-rating pairings:  
215 Go-cued: 50.6%, SE = 3.3%,  $Z = 0.184$ ,  $p = 0.427$ ; Go-uncued 54.2%, SE = 4.0%,  $Z = 0.99$ ,  $p =$   
216 0.162. There were no significant differences between high- and low-rating traits for Go-cued ( $Z$   
217 = 1.31,  $p = 0.190$ ) or Go-uncued items ( $Z = 0.74$ ,  $p = 0.462$ ).

218 After a one-week delay, participants significantly preferred Go-cued over NoGo traits in  
219 high-rating pairings, 56.2%, SE = 2.6%,  $Z = 2.30$ ,  $p = 0.01$ , with a marginally significant effect  
220 in low-rating pairings, 55.3%, SE = 3.2%,  $Z = 1.61$ ,  $p = 0.053$ . The choices of Go-cued traits  
221 were not different between high- versus low-rating pairings ( $Z = -0.24$ ,  $p = 0.810$ ). No choice  
222 preferences were found for Go-uncued over NoGo pairings nor between Go-cued and Go-uncued  
223 traits (all  $ps > 0.2$ ). Together, these results suggest only Go-cued traits (i.e., TMR) showed a  
224 prolonged CAT effect on both high- and low-rating pairs comparably (Figure. 3a).

225

### 226 *Effects of CAT and TMR on Self-Evaluative Judgements*

227 To analyze changes in positive self-evaluations, we ran a GLMM using TMR/CAT conditions  
228 (Go-cued, Go-uncued, and NoGo) and test sessions (pre-, post-TMR, and delay) as fixed effects  
229 to predict binary endorsement. We found no interactions between conditions and test sessions,

230  $\chi^2(4) = 1.89, p = 0.756$ , indicating a null effect of CAT and TMR training on self-evaluative  
231 judgements.

232 Given that reaction times (RT) of choices could also infer preferences<sup>34</sup>, we next ran a  
233 LMM using TMR/CAT conditions and test sessions to predict RTs. There was a significant  
234 interaction between the initial rating and TMR condition only in the delay session,  $F(2, 1,644.2)$   
235  $= 5.06, p < 0.01$  (Figure. 3b). Post-hoc comparisons showed a significantly greater negative  
236 correlation for Go-cued rather than Go-uncued positive traits,  $\beta = -0.10, SE = 0.03, p < 0.01$ , or  
237 NoGo traits,  $\beta = -0.07, SE = 0.03, p = 0.034$ , suggesting higher baseline endorsement levels  
238 would lead to faster RTs during the delay SRET for Go-cued traits. No differences were found  
239 between Go-uncued and NoGo traits,  $\beta = 0.03, SE = 0.03, p = 0.585$ . These negative associations  
240 were not found in previous behavioral patterns when only CAT was used (see SOM, Figure.  
241 S11), suggesting TMR uniquely promoted endorsement speed for high self-descriptive traits.

## 242 **Figure 3**

### 243 *Behavioral Results Across Test Sessions in Free-Recall, Probe and SRET Tasks*

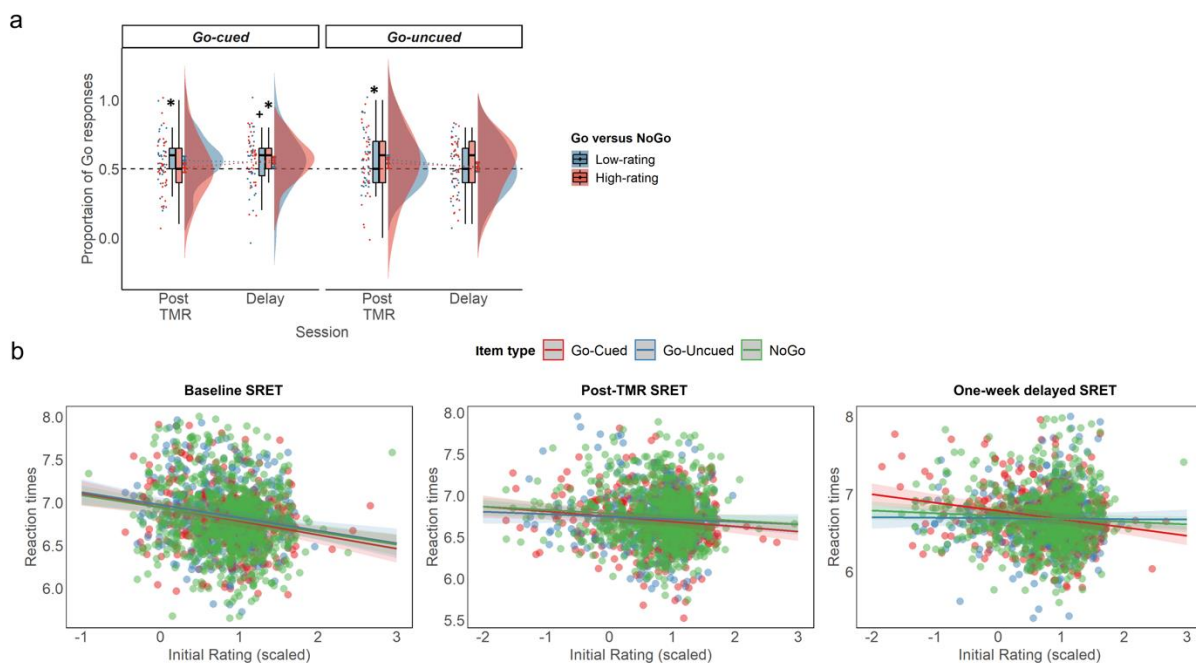

244

245 *Note.* (a). Probe results across sessions for Go-cued and Go-uncued conditions. Distributions are  
246 shown in combinations of boxplots (left, annotated with medians and quartile ranges) and  
247 smoothed kernel density estimates (right, annotated with error bars indicating standard error of  
248 the mean)<sup>35</sup>. The dashed line reflects a chance level of 50%. Asterisks above each bar represent  
249 proportions higher than the chance level in a one-tailed generalized linear mixed-model analysis  
250 (log odds = 0; odds ratio = 1). \*\*  $p < 0.01$ , \*  $p < 0.05$ , +  $p < 0.1$ .  
251 (b). Interaction between initial Rating and TMR Condition on predicting reaction times (via a log  
252 transformation) during baseline SRET (left), post-sleep SRET (middle), and one-week delayed  
253 SRET task (right). Solid lines indicate linear regression fit to the trial-averaged data. The shaded  
254 area indicates two-sided parametric 95% CI.

## 255 **EEG results**

### 256 *Cue-Elicited Sigma Power During TMR Modulated by Pre-Memory Strength*

257 We analyzed cue-elicited electroencephalographic (EEG) responses during the TMR to  
258 investigate the neural mechanisms underlying reactivation of positive traits. Previous research  
259 showed that sleep spindles and spindle-related sigma power (12 to 16 Hz) are among the key  
260 factors driving TMR benefits<sup>36-38</sup>. For example, the cue-elicited spindle density and sigma  
261 power<sup>37,39</sup> positively correlated with post-sleep memory retention<sup>40,41</sup>. Moreover, research  
262 argues that following cue-elicited sigma power increase, there is a critical refractory period  
263 during which sigma power would decrease<sup>42</sup>. Importantly, theoretical accounts proposed that  
264 successful memory reactivation not only depends on the cue-elicited sigma power increase, but  
265 also on the following refractory periods wherein memory is re-processed with minimal  
266 interference<sup>39,42,43</sup>.

267 Here, analyzing the TMR cue-elicited EEG power change at the central electrode (Cz  
268 <sup>20,44</sup>) revealed two significant positive clusters: the delta–theta–alpha band (0.75 to 11.75 Hz,  
269 0.02 to 1.7 seconds), and the sigma–beta band (12 to 28 Hz, 0.3 to 1.66 seconds, Figure. 4a), and  
270 one negative cluster: sigma band (12 to 17 Hz, 1.9 to 2.44 seconds) during the 0 to 3000  
271 milliseconds post-cue time window ( $p < 0.001$ , corrected). These clusters were consistent with  
272 previous findings on cue-elicited modulations during sleep<sup>44</sup>. Following previous research, this

273 earlier positive cluster might represent sensory processing of the cue, whereas the following  
 274 negative cluster corresponded to the refractory period, indicating a cue-specific memory  
 275 reactivation process<sup>45</sup>. Table 2 presents the sleep staging results and Table 3 presents the mean  
 276 number of trials for each -strength condition (i.e., weak, intermediate, strong) for all participants  
 277 (N = 35).

278 **Table 2**

279 Sleep parameters (mean ± SEM, in minutes).

| Participants                                                 | Total time         | Wake               | N1                | N2                 | N3                 | REM                |
|--------------------------------------------------------------|--------------------|--------------------|-------------------|--------------------|--------------------|--------------------|
| All participants<br>(N = 35)                                 | 90.10<br>±<br>1.19 | 10.85<br>±<br>1.14 | 2.88<br>±<br>0.51 | 37.12<br>±<br>1.50 | 28.68<br>±<br>1.84 | 10.58<br>±<br>1.28 |
| Participants contain all<br>three cue conditions<br>(N = 18) | 89.52<br>±<br>1.33 | 11.48<br>±<br>1.63 | 1.96<br>±<br>0.49 | 37.21<br>±<br>2.18 | 30.26<br>±<br>2.64 | 8.62<br>±<br>1.72  |

280

281 **Table 3**

282 Number of trials for each memory strength condition during TMR (mean ±SEM).

| Participants                                                          | Weak           | Intermediate | Strong       | Control      |
|-----------------------------------------------------------------------|----------------|--------------|--------------|--------------|
| All participants<br>(N = 35)                                          | 149.37 ± 9.16  | 43.55 ± 4.36 | 25.33 ± 2.25 | 13.86 ± 0.81 |
| Participants<br>contained in the<br>EEG power<br>analyses<br>(N = 18) | 150.22 ± 12.21 | 43.94±5.27   | 25.39±2.88   | 14.61±1.04   |

283

284 To directly link TMR recall benefits and TMR-elicited EEG activity, we extracted the  
 285 averaged power within the identified significant positive and negative clusters of spindle-related  
 286 sigma band (12 to 16 Hz) for each participant and compared between pre-TMR memory-strength

287 conditions (i.e., weak, intermediate, strong, and control traits) (Figure. 4b–e). Given that both  
288 TMR-elicited sigma power and the refractory period are important for memory reactivation, and  
289 these two sigma activity are often inversely correlated, we quantified the cueing-induced sigma  
290 activity as the difference between the earlier positive (0.58 to 1.64 seconds) and later negative  
291 sigma cluster (1.9 to 2.42 seconds). Specifically, we subtracted the negative cluster from the  
292 positive cluster, with higher values indicating stronger sigma- power changes and therefore  
293 memory reactivation.

294 We ran a LMM using pre-TMR memory strength (i.e., weak, intermediate, strong,  
295 control) as fixed effects, and by participant and trait as random effects, to predict post-cue sigma  
296 power changes (12 to 16 Hz) for each trait word. The included participants were the same as in  
297 post-TMR recall analysis ( $N = 18$ ). We found a significant main effect of pre-memory-strength  
298 condition,  $F(3, 21.85) = 4.84, p = 0.01$ . Pairwise comparisons showed that strong traits elicited  
299 significantly larger sigma power changes than the other three conditions ( $p < 0.001, p = 0.067, p$   
300  $= 0.057$ , compared with weak, intermediate, control, respectively, see Figure. 4f), while no  
301 differences were found among other conditions, all  $ps > 0.08$ . This result might indicate  
302 preferential reactivation and reprocessing for strongly encoded traits during sleep.

303 Next, when separately testing sigma power in the early positive and late negative cluster,  
304 we only found a main effect of pre-memory strength on the negative cluster ( $F(3, 9.7) = 4.96, p$   
305  $= 0.024$ ) but not the positive cluster ( $F(3, 6.1) = 1.82, p = 0.243$ ). Post-hoc comparison showed  
306 that strong traits had been associated with the lowest sigma power as compared to weak and  
307 intermediate traits (all  $ps < 0.05$ ), but no difference from the control trait word ( $p = 0.1$ ). These  
308 results indicate that the difference of post-cue sigma power changes among weak, intermediate,

309 strong, and control traits were most likely driven by the differences of the later negative sigma  
310 cluster.

311 Finally, no significant main effect of pre-memory strength was found when predicting  
312 post-cue delta (0.5 to 4 Hz), theta (4 to 8 Hz), alpha (8 to 12 Hz), or beta (16 to 25 Hz) band  
313 power increases (all  $ps > 0.068$ ).

314

## 315 **Figure 4**

### 316 *Time-frequency Representations Following Cue Presentation*

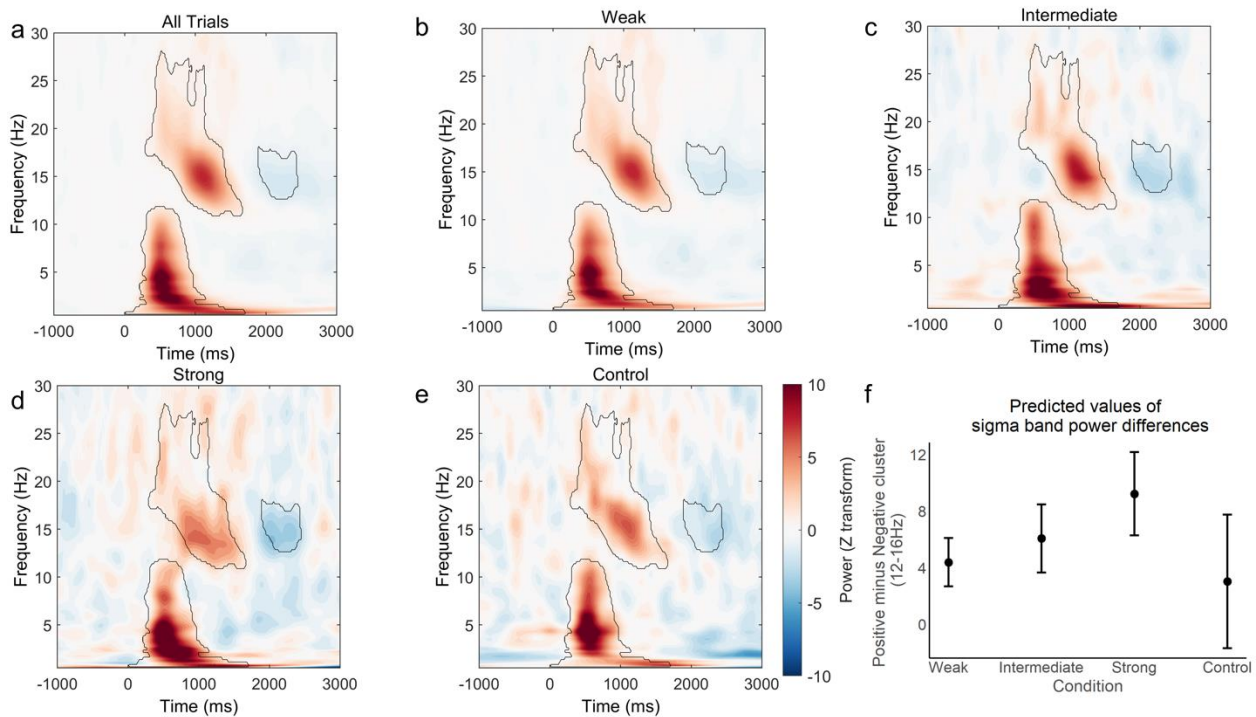

317

318 *Note.* (a) Time-frequency power spectrum averaging all traits played during sleep at channel Cz  
319 (Z transformed). Time zero indicates the onset of spoken traits. (b–e) Time-frequency power  
320 spectrum for specific trait-word types. (f) Predicted values of sigma power differences (the  
321 positive minus the negative cluster at sigma band, 12 to 16 Hz). Black outlines indicate the same  
322 cluster for all pre-TMR memory-strength type traits.

323

### 324 *Relationship Between Sigma Power Change and Self-Evaluation*



325 To explore the relationship between TMR-elicited sigma activity and post-TMR self-evaluative  
326 memories and self-evaluations, we ran a series of LMM analyses using averaged sigma power  
327 changes for each trait as the fixed effect, and by participant and/or trait as random effects to  
328 predict self-evaluation memories (i.e., recall task), self-evaluation preferences (i.e., probe task),  
329 and self-evaluation endorsement (i.e., SRET task).

330 When predicting post-TMR recall order, we found a negative association  $F(1, 244.5) =$   
331  $5.4, p = 0.021$ , such that greater sigma power changes correlated with earlier recall (degree of  
332 association = -0.02). Although there was a trend toward greater post-cue sigma power change  
333 predicted higher post-TMR recall percentage, the association did not reach statistical significance  
334 ( $\chi^2(1) = 3.05, p = 0.081$ ). Next, regarding post-TMR self-evaluation preferences (i.e., binary  
335 choice from Go versus NoGo pairs in the probe task), we found that higher sigma power changes  
336 positively predicted Go choice,  $F(1, 422.03) = 4.84, p = 0.028$ . Finally, when predicting self-  
337 referential endorsement, we did not find any associations between sigma power changes and  
338 endorsement proportion nor endorsement speed after TMR. No predictions were found for the  
339 above models in the one-week delay session (all  $ps > 0.2$ ). Therefore, while sigma-band power  
340 changes might index self-evaluative memory reactivation as evidenced by recall, it remains  
341 unclear whether they bear relationships with self-evaluation preference changes (Figure. 3a) and  
342 self-referential endorsement speed (Figure. 3b).

### 343 **Discussion**

344 We asked whether we could enhance ones' positive self-evaluative memories via wakeful cue-  
345 approach training (CAT) and sleep-based targeted memory reactivation (TMR). Extending prior  
346 CAT research, CAT reliably induced preferences for trained self-evaluative positive-traits  
347 (behavioral replications are reported in SOM). Following CAT, we reactivated a subset of

348 previously trained positive-traits during participants' NREM sleep to enhance their memory  
349 accessibility. Results showed that TMR prioritized the retention of strong self-evaluative trait-  
350 word memories while weakening the retention of intermediate trait-word memories in the short  
351 term. In terms of its possible long-term benefits, participants preferred Go-cued traits as self-  
352 descriptive over NoGo traits, and were faster to endorse Go-cued traits when they were highly  
353 endorsed at the baseline assessment. We also found that re-playing spoken traits to participants  
354 during their sleep enhanced spindle-related sigma power change difference for strongly encoded  
355 traits than for other cue or control traits, which might indicate memory reactivation for highly  
356 self-referential traits.

357         Behaviorally, when assessing CAT and TMR benefits on self-evaluative memories,  
358 participants who were presented with all three types of personality traits (i.e., strong,  
359 intermediate, weak) during sleep consistently showed earlier recall order for strong traits during  
360 the post-TMR free-recall task. This finding indicates that when cueing is performed during sleep,  
361 it enhances the accessibility of traits that were strongly memorized before sleep. Contrary to our  
362 findings in SOM where we found a CAT effect on enhancing recall order for intermediate-type  
363 traits after a one-week delay, TMR weakened intermediate-type traits immediately after cueing,  
364 indicating that the memory benefits for strong traits came at the expense of intermediate traits.  
365 Surprisingly, we did not find any behavioral evidence to support TMR benefits for weak traits.  
366 Note that previous TMR and sleep memory research often reports that weak memories are  
367 preferentially consolidated<sup>16,18,24,46</sup>; such a discrepancy could be due to the materials used.  
368 Whereas prior research has mostly focused on self-irrelevant materials, such as images and  
369 words, we examined self-evaluative memories. Particularly, participants were less likely to  
370 endorse weak traits as self-descriptive and were unable to recall them in either of the pre-sleep

371 tests. The significantly low level of endorsement might make weak traits less salient and further  
372 prevent them from being consolidated. Note, the definitions of, and testing protocols for,  
373 memory strengths also differ across studies, making direct between-study comparisons difficult,  
374 if not impossible<sup>47</sup>. Hence, previous findings that showed weak memories were preferentially  
375 consolidated during sleep may not generalize to self-evaluative memories. By contrast, we  
376 postulate that for reactivating traits during sleep, strongly encoded, highly self-relevant  
377 memories might be better preserved given their higher salience.

378         In examining how TMR-related neural activity influenced subsequent self-evaluative  
379 memory recall, we found that spoken traits induced a transient spindle-related sigma power  
380 increase shortly after the cue onset, as well as a late power decrease around 2–3 seconds after cue  
381 presentation. Although previous TMR studies have reported a positive link between the transient  
382 post-cue sigma power increase and promoted memory<sup>48,49</sup>, our findings did not reveal such an  
383 association. Instead, when we closely examined post-cue sigma power, the difference between  
384 the early positive and late negative sigma cluster (which we defined as sigma power change), as  
385 well as the negative cluster, proved statistically significant among different cues. Importantly,  
386 trait adjectives that were strongly memorized prior to sleep elicited greater spindle-related sigma  
387 power change than other traits (albeit marginally greater than control and intermediate traits),  
388 indicating a preferential memory reactivation for strong traits<sup>50</sup>. This result also suggests that  
389 early sensory processing and a late refractory period following a spoken trait word are necessary  
390 for its successful memory reactivation<sup>45</sup>. Additionally, in this study we had unbalanced trial  
391 numbers for the cueing traits that were assigned to the three memory conditions; future studies  
392 could include more traits and trials to examine the replicability of cueing-induced spindle  
393 activity for weak, intermediate, or strong self-evaluative memories. Nevertheless, the present

394 findings extend prior research on vocabulary reactivation, indicating that the sleeping brain not  
395 only processes newly acquired vocabularies or semantic words <sup>17,51</sup>, but also self-evaluative trait  
396 memories.

397         In addition to self-evaluative memories, we also assessed participants' self-evaluation  
398 preferences in the binary-probe task. We found that after CAT, participants were more likely to  
399 choose Go versus NoGo traits as self-descriptive. This result extends prior CAT research <sup>10</sup>,  
400 demonstrating that CAT is effective for influencing change in not only food choices but also  
401 self-evaluations. We subsequently examined whether reactivating positive traits during sleep  
402 could further influence participants' self-evaluations. Immediately after sleep, TMR cueing did  
403 not shift participants' preference choices toward Go-cued than Go-uncued traits, although  
404 participants preferred both Go-cued and Go-uncued traits over NoGo traits (i.e., the CAT effect).  
405 In other words, the TMR did not further improve CAT effects in self-evaluation preferences.  
406 Notably, TMR benefits may emerge over a longer term one week later: participants were more  
407 likely to choose Go-cued than NoGo traits as self-descriptive, although the differences between  
408 CAT-cued and CAT-uncued traits did not reach significance. These results suggest TMR may  
409 preserve the CAT effect (Go-cued > NoGo) in the binary-preference choice task after a long-  
410 term delay. However, no clear associations were identified between TMR induced EEG power  
411 changes and choice preference in the delay session. This might indicate that long-term preference  
412 change was not driven by sigma power change difference.

413         When assessing participants' binary endorsement change using SRET, we did not find  
414 significant main effects of CAT or TMR. We postulated that, because the endorsement  
415 proportion of positive traits was already high (i.e., > 80%), such a ceiling would leave little space  
416 for CAT or TMR to increase participants' positive trait endorsement. In addition to endorsement

417 judgement, reaction times (RT) of a certain choice could also infer preferences<sup>34</sup>. By examining  
418 the association between endorsement ratings and RT across different memory-strength  
419 conditions, we found a stronger negative association for Go-cued rather than Go-uncued traits  
420 after a one-week delay, which suggests cueing strongly-endorsed traits during sleep leads to the  
421 faster endorsement in the long term. Thus, TMR selectively promoted endorsement speed for  
422 initially high-endorsed traits. Note, we also failed to observe any associations between cue-  
423 elicited EEG power changes and endorsement proportion or speed. This could be due to the  
424 ceiling effect reported in SRET (> 80% endorsement rates for positive traits), which may prevent  
425 us from detecting the possible TMR benefits on endorsements. To better understand memory  
426 reactivation and positive self-endorsement changes, future studies could carefully match the  
427 number of endorsed traits and not-endorsed traits prior to TMR.

428       Limitations shall be discussed. First, because our study only included self-relevant traits,  
429 to which extent the observed effects are self-specific remain an open question. For example, can  
430 CAT and TMR be used to increase people's endorsements for traits that are considered as  
431 relevant to other people? Can the impact of pre-sleep memory strength on TMR effects be found  
432 for non-personality, neutral words? Second, due to the limited amount of time participants spent  
433 in REM sleep during nap, our current dataset did not allow for further testing of the role of REM  
434 sleep in consolidating self-evaluative memories. Given that REM sleep plays an important role in  
435 emotional memory and vocabulary learning<sup>52,53</sup>, future research shall test the role of REM-  
436 related processing in self-evaluative memories.

437       To summarize, we show that reactivating positive personality traits during NREM sleep  
438 impacts the consolidation of self-evaluative memories as a function of pre-sleep memory  
439 strength. TMR prioritized recall of strong self-evaluative memories, which also elicited enhanced

440 sigma power during sleep. In contrast, intermediate self-evaluative memories were weakened,  
441 and no change was identified for weak self-evaluative memories. After one week, TMR not only  
442 preserved preferences for cued traits, but also facilitated endorsement of traits when they were  
443 highly endorsed at baseline, prior to CAT and TMR manipulations. These findings highlight the  
444 importance of internal (i.e., baseline endorsement of traits) and external factors (e.g., training,  
445 sleep, self-evaluative tasks) in generating the joint effect of CAT and TMR on self-evaluation.  
446 The present study contributes to the understanding of self-evaluative memories via cognitive  
447 training and sleep-based memory-reactivation paradigms. If positive self-evaluations and  
448 memories can be enhanced, future research can test whether this approach can help people with  
449 low self-evaluations and self-doubts.

## 450 **Methods**

### 451 **Participants**

452 Our final sample included 35 participants with valid behavioral and EEG data (8 males,  $M_{age} \pm$   
453  $SD = 20.83 \pm 2.20$  years), which is comparable to recent TMR studies (e.g., Schechtman et al.  
454 2021). 10 participants were excluded prior to this due to insufficient slow-wave sleep (SWS),  
455 and thus very few numbers of cues were played ( $< 2$  rounds). To facilitate sleep in the lab, we  
456 asked participants to wake up one hour earlier than their usual waking time and to avoid  
457 consuming caffeinated drinks on the day prior to – and of – the experiment. Participants were  
458 pre-screened regarding any current or history of sleep, psychiatric, or neurological disorders and  
459 had normal or corrected-to-normal vision. Participants received monetary compensation for their  
460 participation (250 RMB, or roughly 38 USD) and gave written consent prior to the experiment.

461 The study was approved by the Human Research Ethics Committee of the University of Hong  
462 Kong.

## 463 **Materials**

464 All experimental procedures were implemented in E-Prime® 3.0 (Psychology Software Tools,  
465 Inc., Sharpsburg, Pennsylvania, USA). We selected 60 positive personality trait adjectives (e.g.,  
466 ‘clever’) and 60 negative personality trait adjectives (e.g., ‘lazy’; see SOM for the complete list  
467 of personality traits). Each trait word was presented verbally for a duration of 400 to 600  
468 milliseconds. In addition, we intermixed a novel adjective that was only played during TMR with  
469 the other cue words as a control.

## 470 **Experimental Tasks**

### 471 *Task Overview*

472 Participants attended two lab sessions, scheduled approximately one week apart (Figure. 1a). In  
473 the first session, participants arrived to the lab at approximately 12:00 pm (exact arrival times  
474 ranged between 11:30 am to 12:30 pm), where they read and signed consent forms and were set  
475 up with EEGs. Subsequently, a series of four task phases began in which participants completed  
476 a number of tests, beginning with baseline tests in the first phase, followed by CAT and post-  
477 CAT/pre-TMR tests in the second phase, sleep-based TMR in the third phase, and post-TMR  
478 tests in the fourth phase. In the preliminary baseline phase, participants completed computer-  
479 based personality questionnaires, serving as a cover story for the personality trait words  
480 (hereafter, traits) presented to them in the following SRET. During the SRET, participants rated  
481 the extent to which specific traits described themselves. Participants then completed a self-  
482 evaluative memory free-recall test. In the second phase, participants manually responded to  
483 positive traits (i.e., Go traits), prompted by visual and aural cues presented on screen and from a

484 nearby loudspeaker (CAT). Participants then completed a free-recall test and a probe test, in  
485 which they were presented with Go and NoGo trait word pairs and asked to select the trait word  
486 that was more self-descriptive. In the third phase, half of the positive traits were aurally re-  
487 played to sleeping participants during slow-wave sleep (SWS). Then, in the fourth phase,  
488 participants completed the same free-recall test, probe test, and SRET. In the second lab visit (~  
489 7 days later), participants completed the same free-recall test, probe test and SRET as previously  
490 completed in the final phase of the first visit to examine the possible long-term TMR effects.  
491 Thus, they completed four self-evaluative memory free-recall tests (baseline, post-CAT, post-  
492 TMR, delay), three SRETs (baseline, post-TMR, delay), and three probe tasks (post-CAT, post-  
493 TMR, delay).

#### 494 ***Baseline***

495 Participants completed preliminary computer-based personality questionnaires, including the  
496 Rosenberg Self-Esteem Scale (RSES<sup>54</sup>), Narcissistic Personality Inventory (NPI<sup>55</sup>), Big Five  
497 Inventory (BFI<sup>56</sup>), Beck Depression Inventory-II (BDI-II<sup>57</sup>), State-Trait Anxiety Inventory (STAI  
498 state and STAI trait<sup>58</sup>), and Barratt Impulsiveness Scale (BIS-11<sup>59</sup>). This served as a cover story  
499 to promote the reliability of the personality trait adjectives that would be presented to them in the  
500 following self-referential encoding task (SRET). Descriptions of questionnaire scores are  
501 presented in Table S2.

502 In SRET (see Figure. 1b), a cross symbol was presented on a computer screen at the  
503 beginning of each trial for 0.5 seconds, followed by the presentation of the sentence ‘I think this  
504 word is applicable to me’ in the center of the screen for another 0.5 seconds. After 1.2 to 1.4  
505 seconds, participants were presented with a random word, given visually in written form and  
506 aurally from a speaker, from a selection of 120 adjectives for 0.8 seconds. After, participants



507 were shown a blank screen for another 0.8 seconds and then were prompted to select if a trait  
508 word applied to them within 2.5 seconds by moving the mouse cursor continuously. The spatial  
509 location of ‘Yes’ and ‘No’ responses were counterbalanced (upper left/upper right or upper  
510 right/upper left). Following a ‘Yes’ response, participants were asked to rate the extent to which  
511 a trait word applied to them on a scale ranging from “slightly accurate” to “extremely accurate”;  
512 following a ‘No’ response, participants were asked to rate the extent to which a trait word did not  
513 apply to them on a scale ranging from “slightly inaccurate” to “extremely inaccurate”.

514         Within the three minutes that followed, participants were asked to complete a self-  
515 evaluative free-recall task. Unlike previous recall tasks where participants must write down as  
516 many traits as possible, here, participants were asked to recall only the traits they had been  
517 presented with and endorsed during the previous SRET, typing each recalled word on a computer  
518 one at a time. Therefore, performance during this version of the recall task reflected self-  
519 evaluative memories.

### 520 *CAT and Post-CAT Tests*

521 Following baseline assessments, participants completed a CAT task, followed by a 5-minute  
522 working memory task for distraction purposes. In the CAT (see Figure. 1c), we ranked all 60  
523 positive traits from 1 (least accurate) to 60 (most accurate) based on the methods of Schonberg et  
524 al. (2014) and the SRET endorsement ratings. During CAT, 30 traits (across the entire list of trait  
525 adjectives) were paired with a visual Go cue that required participants to press a button as  
526 quickly as possible before the current trial’s offset. The Go traits were presented aurally (< 0.8  
527 seconds) and visually (1.2 seconds), followed by Go cues. We used an adaptive response  
528 window to keep participants attentive to Go cues. Specifically, initial Go cues were presented  
529 with a GSD (the delay between trait-word onset and Go-cue onset) of approximately 0.9 seconds.

530 If the participants successfully pressed a button before the offset of the trial, the GSD was  
531 increased by 17 milliseconds to increase task difficulty. If participants failed to make a button  
532 press before the offset of the trial, the GSD was reduced by 50 milliseconds to reduce task  
533 difficulty. Participants then completed a 3-minute post-CAT self-evaluative memory-recall task,  
534 as used in the baseline assessment.

535       Next, participants completed a post-CAT probe task so we could assess CAT effects. In the  
536 probe task (see Figure. 1d), a fixation cross appeared in the center of the screen for 1 second at  
537 the beginning of each trial. Following this, participants viewed two traits that were presented  
538 side-by-side and were instructed to select the trait word that best described them within 4  
539 seconds. We excluded trials where response times exceeded 5 seconds, allowing a short window  
540 of time to account for potential delays caused by using the mouse. Participants confirmed their  
541 selection by clicking a push button, lasting for 0.5 seconds, which appeared under their chosen  
542 trait word. If participants took longer than 4 seconds to respond, they received a prompt in the  
543 confirmation phase to remind them to respond as quickly as possible. To balance the positions of  
544 Go and NoGo traits, we carried out a total of two blocks. The positions of the Go/NoGo traits per  
545 pair were randomly assigned to the upper-left/right or upper-right/left sides of the monitor in the  
546 first block. In the second block, each pair's left/right positions were swapped accordingly.

#### 547 *Nap Targeted Memory Reactivation (TMR)*

548 Participants took a 90-minute nap in a quiet, darkened sleep chamber. Background white noise  
549 (at ~ 38 dB) was played to participants throughout the duration of the nap via a loudspeaker  
550 placed near the bed. We used EEG recording devices to monitor participants' brain and  
551 physiological activities continuously while they napped. Once they entered SWS, we presented  
552 spoken, positive traits (the same spoken traits presented during the SRET and CAT tasks) at

553 approximately 40 dB. Note, we set the volume of white noise to approximately 38 dB to ensure  
554 that the spoken traits (played at ~ 40 dB) could be heard above it, yet on a subtle level to avoid  
555 arousing participants from their nap.

556 Each spoken trait lasted no longer than 1 second, with an interstimulus interval of 5  
557 seconds and an additional randomized interval of 0 to 1 second. Half of the positive Go traits  
558 were played during the TMR (i.e., 15 traits in total; see the previous section on CAT/TMR trait  
559 word-groupings for more details about trait selection). Additionally, we included a neutral trait  
560 word to the playlist, lasting a duration of 600 milliseconds, intermixed into each play cycle.  
561 Presenting the neutral trait word enabled us to monitor participants' brain activity specific to  
562 cued-memory reactivation versus nonspecific auditory processing of semantic stimulation. The  
563 minimal number of repetitions of a sequence (i.e., 16 traits) was 3.

564 Specifically, spoken traits were played to participants until they showed sustained SWS  
565 (i.e., SWS lasting at least 2 minutes). We then played the novel control spoken traits three times  
566 at the beginning of the TMR to ensure that the auditory stimulation did not wake participants.  
567 We started presenting the spoken traits to participants when they exhibited no more signs of  
568 arousal or changes in NREM sleep stage. If participants awoke, we stopped playing the cues and  
569 waited for them to re-enter SWS before repeating the above procedures. TMR was terminated  
570 immediately after 30 minutes except when SWS was not observed, or EEG recordings indicated  
571 micro-arousal or full awakening. If we observed no sign of SWS after 40 minutes, we started  
572 presenting the spoken traits to participants when they entered the N2 stage of sleep. We woke  
573 participants when their EEG recordings indicated that they had entered the N1 or N2 sleep stage  
574 (after around 90 minutes). After waking, participants were given a break of approximately 5  
575 minutes to reduce the effects of sleep inertia.

576 *Post-TMR Tests*

577 Participants completed the free-recall task, probe task, and SRET task. Here, the SRET was  
578 similar to the baseline SRET except participants only made a ‘Yes’/‘No’ binary response.

579 *One-Week Delayed Tests*

580 Participants returned to the lab around one week later to complete the delayed tests. They  
581 completed the following tasks in order: (1) a 3-minute self-evaluative memory-recall task; (2) a  
582 probe task; (3) a SRET ‘Yes’/‘No’ self-evaluative task; and (4) post-experiment questionnaires.  
583 Unless otherwise stated, the tasks were identical to the ones used in the behavioral study in  
584 SOM. Participants were not informed of the tasks involved during the entire experiment. After  
585 the visit, participants were debriefed and paid.

586 **Details of the Stimuli used in the CAT, Probe, and TMR Tasks.** For the selection of  
587 Go and NoGo traits with matched ratings during the probe task, we sorted all ratings from lowest  
588 (1) to highest (60), then grouped Go and NoGo traits as follows: one Go and one NoGo item  
589 from the same rank for matched Go and NoGo trait word pairings, generating 30 pairs in total.  
590 Using the same sorting strategy as before, we grouped each pair into low- and high-rating pairs  
591 based on the order (see Figure. S12a for details of how Go/NoGo traits were assigned and  
592 counterbalanced across participants). We used this pairing strategy to obtain similar initial  
593 endorsement ratings between Go and NoGo traits. We also paired one low-value Go item from  
594 ranks 5 to 24 with one high-value NoGo item from ranks 37 to 56 (see Figure. S12b) and one  
595 low-value NoGo item from ranks 5 to 24 with one high-value NoGo item from ranks 37 to 56  
596 (see Figure. S12c); additionally, we paired one low-value Go item with one high-value Go item  
597 (see Figure. S12d) and one low-value NoGo item with one high-value Go item (see Figure.

598 S12e), but these pairings served as controls to rule out mere exposure effects and were therefore  
599 not analyzed.

600 Finally, we assigned Go traits to Go-cued and Go-uncued categories, following the same  
601 order per participant (see Figure. S12 for the selection and grouping of positive traits during the  
602 CAT, probe, and TMR).

### 603 **EEG Data Acquisition**

604 Continuous EEGs were recorded using a 63-channel customized cap with passive Ag/AgCl  
605 electrodes via a BrainAmp amplifier with 1000 Hz sampling rate (Brain Products, Gilching,  
606 Germany). Electrodes were positioned according to the International 10–10 system. The ground  
607 electrode was located at AFz, with FCz as the on-line reference electrode. The impedances were  
608 kept below 20 k $\Omega$ . We placed one electro-oculography (EOG) electrode under participants' left  
609 eyes and bipolar electromyography (EMG) electrodes on their chins to monitor eye movements  
610 and muscle activity during sleep.

### 611 **Behavioral Data Analysis**

612 Statistical analyses were carried out using R (Version 4.2.1.<sup>60</sup>). Behavioral analysis methods  
613 were like those used in the behavioral experiments in SOM, except the TMR factor was added  
614 where applicable. We performed (G)LMMs to analyze the CAT- and TMR-induced behavioral  
615 changes.

616 For statistical significance testing, we used Type III Analysis of Variance with the  
617 Satterthwaite approximation method for the LMM, and Type III Wald Chi-Square tests for the  
618 GLMM. We followed up significant effects with post-hoc comparisons in *emmeans*<sup>61</sup> to derive

619 the estimated marginal means from each model. Unless otherwise stated, we used the FDR  
620 method to adjust for multiple comparisons to control for false-positive results.

### 621 *Behavioral Replication Analysis in the Baseline Session*

622 To test whether we replicated the classic pattern of valence-dependent memory bias, we ran two  
623 paired t tests with valence as the independent variable, endorsement proportion (via SRET), and  
624 processing bias score (via free-recall task and the number of positive/negative traits words that  
625 were recalled and endorsed divided by number of traits endorsed) as the dependent variable,  
626 respectively. Next, we ran a Pearson correlation test to examine the relationship between BDI  
627 scores (depressive symptoms) and the self-evaluative memory bias from the recall task at  
628 baseline session. The self-evaluative memory bias was defined as the difference between the  
629 positive and negative processing score, with a higher score indicating a larger self-positive  
630 processing bias.

### 631 *Self-Evaluative Memories in the Free-Recall Task*

632 To better depict memory changes across multiple times, we took preceding recall performance  
633 into account in the (G)LMMs. Specifically, when analyzing post-CAT recall performance, we  
634 added the baseline recall ('Yes'/'No') as a fixed effect. When analyzing post-TMR recall  
635 performance, we grouped traits into weak, intermediate, and strong categories depending on  
636 baseline and post-CAT recall tasks. We defined weak-condition traits as traits that were not  
637 recalled at all in both baseline and post-CAT tests, intermediate-condition traits as traits that  
638 were only recalled once in either baseline or post-CAT tests, and strong-condition traits as traits  
639 that were recalled in both baseline and post-CAT tests. Only participants with all three types of  
640 traits for cued and uncued conditions were included in our analysis.

641 Next, we performed the following four (G)LMMs across post-CAT and post-TMR for three  
642 outcome variables: (1) recall or not recall; and (2) recall order. These were as follows:

643 (1) Recall (binary, ‘Yes’ or ‘No’):

644 The GLMM for the immediate post-CAT recall task was defined as:

645 
$$\text{Post-CAT\_Yes/No} \sim 1 + \text{CAT Condition} \times \text{Baseline recall} + (1 + \text{CAT} | \text{Subject ID}) +$$
  
646 
$$(1 | \text{Trait ID}).$$

647 The GLMM for the post-TMR recall task was defined as:

648 
$$\text{Post-TMR\_Yes/No} \sim 1 + \text{TMR Condition} \times \text{Memory Strength} + (1 + \text{TMR} | \text{Subject ID}) +$$
  
649 
$$(1 | \text{Trait ID}).$$

650 (2) Recall order of recalled traits:

651 Note, we removed the random factor for participant because the model encountered a singular  
652 fitting issue due to the limited number of traits per CAT/TMR condition. The LMM for the for  
653 post-CAT recall task was defined as:

654 
$$\text{Post-CAT\_Recall Order} \sim 1 + \text{CAT Condition} \times \text{Baseline Recall} + (1 | \text{Trait ID}).$$

655 The LMM for the post-TMR recall task was defined as:

656 
$$\text{Post-TMR\_Recall Order} \sim 1 + \text{TMR Condition} \times \text{Memory Strength} + (1 | \text{Trait ID}).$$

### 657 *Evaluation Preference in the Probe Task*

658 Following previous CAT research, we ran GLMMs separately for low- and high-rating subsets  
659 across three test sessions (i.e., post-CAT, post-TMR, and delay) on binary choice outcome in the  
660 probe task. To investigate the effect of TMR on binary choices during post-TMR and delay, we  
661 separated trait-word pairs into Go-cued and Go-uncued categories after the nap TMR and tested  
662 them by adding a TMR condition (i.e., Go-cued versus Go-uncued) as the fixed effect.

663 Specifically:

664 (1) We ran a GLMM with the choice ('Yes' or 'No') as the dependent variable and participants  
665 as the random effect to evaluate the CAT effect on self-evaluative judgment change. The  
666 simplest GLMM was defined as:

667  $\text{Choice} \sim 1 + (1|\text{Subject ID})$ .

668 (2) Next, we added high- versus low-rating Go-NoGo (GNG) pairs as a fixed effect and  
669 participants as the random effects to explore the difference in probe across low- versus high-  
670 rating traits. This line of GLMMs were defined as:

671  $\text{Choice} \sim 1 + \text{High Low} + (1|\text{SubjectID})$ .

672 (3) We ran the GLMM with the TMR as a fixed effect to test the TMR benefits. This GLMM  
673 was defined as:

674  $\text{Choice} \sim 1 + \text{TMR} + (1|\text{SubjectID})$ .

675 Note, we applied a one-sided test for the simplest GLMMs but a two-sided test for the other  
676 comparisons to be consistent with CAT literature.

### 677 *Self-Evaluative Judgments in the SRET*

678 To analyze the changes in positive self-evaluative judgments, we ran a GLMM for the positive  
679 traits only. The model is specified as:

680  $\text{Choice} \sim 1 + \text{Session} \times \text{TMR} + (1+\text{TMR} | \text{Subject ID}) + (1|\text{Trait ID})$ .

681 Finally, to examine potential associations between initial rating strength, TMR, and RTs  
682 of 'Yes' answers, we analyzed trial-level RTs using a linear mixed model with initial rating,  
683 TMR condition as the fixed effect, and participant as the random effect, separately across post-  
684 CAT, post-TMR, and delay. Since participants' responses could change between test sessions,  
685 the relationship between initial rating strength and RT was examined separately for each test  
686 session. Note, due to the limited trait numbers assigned to each memory-strength condition (i.e.,



687 weak, intermediate, strong), we removed the random slope for participant and random effect for  
688 trait IDs in the (G)LMMs to avoid a singular fitting problem.

689 The LMM was defined as:

690  $\text{Log RT} \sim 1 + \text{TMR} \times \text{Initial rating} + (1 | \text{Subject ID})$ .

691 Unless otherwise stated, all tests were two-sided, with alpha level set at .05.

## 692 **EEG Data Analysis**

### 693 *EEG Data Pre-Processing*

694 EEG data were pre-processed using custom-written scripts and the MATLAB Toolbox EEGLAB

695 <sup>62</sup>. First, nap EEG data were down-sampled to 250 Hz, notch-filtered at 50 Hz, and then re-

696 referenced to the averaged mastoids. Second, EEG data were band-pass filtered at 0.1 to 40 Hz.

697 While EOG and EMG data were used for sleep staging, these data were not used in the time-

698 frequency analysis and phase analysis.

### 699 *Offline Sleep Stage Scoring*

700 In sleep offline analyses, we scored sleep stages (N1, N2, SWS, and rapid-eye-movement

701 (REM)) based on EEG (Channel Cz), EOG, and EMG patterns, using algorithms implemented in

702 the YASA open-source Python Toolbox <sup>63</sup>.

### 703 *Time-Frequency Power Analysis*

704 Before analyzing cue-elicited time-frequency power change, the cue-elicited EEG data were

705 epoched into -4 to 6 second segments, relative to the onset of each cued trait word. This long

706 epoch ensured that we had enough edge artifact-free segments for each clean epoch to assess

707 TMR benefits ( -1 to 3 seconds). Epochs with artefact were visually inspected and removed.

708 Time-frequency decomposition was performed in the Fieldtrip open-source MATLAB toolbox

709 <sup>64</sup>. We used 3 to 15 cycles in a step of 0.25 Hz Morlet wavelet and baseline corrected using z-

710 transformation of all trials from -1000 to -100 milliseconds relative to the cue onset. Following  
711 previous TMR studies<sup>20,65</sup>, we selected data from channel Cz for further analyses. The calculated  
712 time-frequency decompositions were then down-sampled to 50 Hz.

713 To identify significant cue-elicited EEG activity, we conducted non-parametric  
714 permutation tests to test the significance of cue-elicited power changes. We used a cluster-based  
715 permutation test to find the common region across all participants in the time-frequency domain  
716<sup>66</sup>. Specifically, time frequency representations were shuffled within each participant 1000 times.  
717 The shuffled data were used to identify null distribution effects. Then we established temporally-  
718 and spectrally adjacent significant clusters (threshold  $p$  at 0.001). Next, we calculated the sum of  
719 t-values for each identified cluster in the original and permuted data. If no t-values reached  
720 significance in the permutations, the cluster was classified as 0. We then calculated the rank of  
721 cluster t-values in the distribution of random data. The cluster was marked as significant if an  
722 absolutely higher t-value was found in less than 0.1% of the random permutations.

723 Note, traits were grouped into three conditions based on baseline recall and post-CAT  
724 recall (i.e., weak, intermediate, strong). We then performed a linear mixed model with the four  
725 conditions as the fixed effect and by participant and trait word as random effects to predict the  
726 identified post-cue power change on single trait word level, including (1) the post-cue sigma  
727 power change differences between the positive and negative cluster (12 to 16 Hz), (2) delta-  
728 theta-alpha (0.5 to 4 Hz, 4 to 8 Hz, and 8 to 12 Hz) and beta (16 to 25 Hz) power changes. We  
729 used a boxplot method to detect potential outliers on the item level prior to performing statistical  
730 analysis for each power band, respectively. No multiple comparison corrections were applied  
731 during post-hoc tests due to a prior hypothesis that Go-cued traits would elicit greater power

732 change than control traits. To match the findings observed in the post-TMR recall task, we ran  
733 this analysis on the same 18 participants. The model was defined as:

734  $\text{Sigma power change difference} \sim 1 + \text{Condition} + (1|\text{Subject ID}) + (1|\text{Trait ID})$ .

735 To explore the potential difference of positive and negative post-cue sigma power, we ran the  
736 LMM on these two clusters separately. The model was defined as:

737  $\text{Positive cluster/Negative cluster} \sim 1 + \text{Condition} + (1|\text{Subject ID}) + (1|\text{Trait ID})$ .

### 738 ***Brain-Behavior Association Analysis***

739 To explore participants' EEG activity and behavioral performance after TMR, we also ran  
740 several (G)LMMs using post-cue sigma power difference (i.e., difference between the positive  
741 and negative cluster in sigma band, 12 to 16 Hz) as the fixed effect and by participant and/or trait  
742 word as random effects. We ran this analysis on behavioral measurements obtained from the  
743 post-TMR recall task, probe task, and SRET during post-TMR and delay sessions, respectively.

744 We removed the by-participant or trait-word random effect if the model encountered a singular  
745 fitting issue.

746 In the free-recall task, the models were defined as:

747 (1) Recall outcome (Yes/No)  $\sim 1 + \text{Sigma power change difference} + (1|\text{Subject ID}) +$   
748  $(1|\text{Trait ID})$ .

749 (2) Recall Order (Logged)  $\sim 1 + \text{Sigma power change difference} + (1|\text{Trait ID})$ .

750 In the probe task, the model was defined as:

751 Choice (Yes/No)  $\sim 1 + \text{Sigma power change difference} + (1|\text{Subject ID}) + (1|\text{Trait ID})$ .

752 In the SRET task, the models were defined as:

753 (1) Choice (Yes/No)  $\sim 1 + \text{Sigma power change difference} + (1|\text{Subject ID}) + (1|\text{Trait}$   
754  $\text{ID})$ .

755 (2) Reaction times (Logged)  $\sim 1 + \text{Sigma power change difference} + (1|\text{Subject ID}) +$   
756  $(1|\text{Trait ID})$ .

## 757 **Data and code availability**

758 The data and analytical code supporting the study's findings are available at the Open Science

759 Framework repository: [https://osf.io/h2967/?view\\_only=1b259a176db245b4b9ef0e1b64ca74f9](https://osf.io/h2967/?view_only=1b259a176db245b4b9ef0e1b64ca74f9).

760 **References**

- 761 1. Fields, E. C. & Kuperberg, G. R. Loving yourself more than your neighbor: ERPs reveal  
762 online effects of a self-positivity bias. *Soc. Cogn. Affect. Neurosci.* **10**, 1202–1209 (2015).
- 763 2. Guenther, C. L. & Alicke, M. D. Deconstructing the better-than-average effect. *J. Pers.*  
764 *Soc. Psychol.* **99**, 755–770 (2010).
- 765 3. Taylor, S. E. & Brown, J. D. Illusion and well-being: A social psychological perspective  
766 on mental health. *Psychol. Bull.* **103**, 193–210 (1988).
- 767 4. Watson, L. A., Dritschel, B., Obonsawin, M. C. & Jentsch, I. Seeing yourself in a  
768 positive light: Brain correlates of the self-positivity bias. *Brain Res.* **1152**, 106–110 (2007).
- 769 5. Dainer-Best, J., Trujillo, L. T., Schnyer, D. M. & Beevers, C. G. Sustained engagement  
770 of attention is associated with increased negative self-referent processing in major depressive  
771 disorder. *Biol. Psychol.* **129**, 231–241 (2017).
- 772 6. Sowislo, J. F., [Link to external site, this link will open in a new window](#), Orth, U. &  
773 [Link to external site, this link will open in a new window](#). Does low self-esteem predict  
774 depression and anxiety? A meta-analysis of longitudinal studies. *Psychol. Bull.* **139**, 213–240  
775 (2013).
- 776 7. Orth, U., [Link to external site, this link will open in a new window](#), Robins, R. W. &  
777 [Link to external site, this link will open in a new window](#). Is high self-esteem beneficial?  
778 Revisiting a classic question. *Am. Psychol.* **77**, 5–17 (2022).
- 779 8. Schonberg, T. *et al.* Changing value through cued approach: an automatic mechanism of  
780 behavior change. *Nat. Neurosci.* **17**, 625–630 (2014).

- 781 9. Oudiette, D. & Paller, K. A. Upgrading the sleeping brain with targeted memory  
782 reactivation. *Trends Cogn. Sci.* **17**, 142–149 (2013).
- 783 10. Salomon, T. *et al.* The Cue-Approach Task as a General Mechanism for Long-Term Non-  
784 Reinforced Behavioral Change. *Sci. Rep.* **8**, 3614 (2018).
- 785 11. Itzkovitch, A., Bar Or, M. & Schonberg, T. Cue-approach training for food behavior.  
786 *Curr. Opin. Behav. Sci.* **47**, 101202 (2022).
- 787 12. Diekelmann, S. & Born, J. The memory function of sleep. *Nat. Rev. Neurosci.* **11**, 114–  
788 126 (2010).
- 789 13. Rasch, B. & Born, J. About Sleep’s Role in Memory. *Physiol. Rev.* **93**, 681–766 (2013).
- 790 14. MacDonald, K. J. & Cote, K. A. Contributions of post-learning REM and NREM sleep to  
791 memory retrieval. *Sleep Med. Rev.* **59**, 101453 (2021).
- 792 15. Petzka, M., Chatburn, A., Charest, I., Balanos, G. M. & Staresina, B. P. Sleep spindles  
793 track cortical learning patterns for memory consolidation. *Curr. Biol.* **32**, 2349-2356.e4 (2022).
- 794 16. Creery, J. D., Oudiette, D., Antony, J. W. & Paller, K. A. Targeted Memory Reactivation  
795 during Sleep Depends on Prior Learning. *Sleep* **38**, 755–763 (2015).
- 796 17. Schreiner, T. & Rasch, B. Boosting Vocabulary Learning by Verbal Cueing During  
797 Sleep. *Cereb. Cortex* **25**, 4169–4179 (2015).
- 798 18. Cairney, S. A., Lindsay, S., Sobczak, J. M., Paller, K. A. & Gaskell, M. G. The Benefits  
799 of Targeted Memory Reactivation for Consolidation in Sleep are Contingent on Memory  
800 Accuracy and Direct Cue-Memory Associations. *Sleep* **39**, 1139–1150 (2016).

- 801 19. Schapiro, A. C. *et al.* Sleep Benefits Memory for Semantic Category Structure While  
802 Preserving Exemplar-Specific Information. *Sci. Rep.* **7**, 14869 (2017).
- 803 20. Whitmore, N. W., Bassard, A. M. & Paller, K. A. Targeted memory reactivation of face-  
804 name learning depends on ample and undisturbed slow-wave sleep. *Npj Sci. Learn.* **7**, 1–6  
805 (2022).
- 806 21. Abdellahi, M. E. A., Koopman, A. C. M., Treder, M. S. & Lewis, P. A. Targeting  
807 targeted memory reactivation: characteristics of cued reactivation in sleep. 2021.12.09.471945  
808 Preprint at <https://doi.org/10.1101/2021.12.09.471945> (2021).
- 809 22. Memory reactivation in slow wave sleep enhances relational learning | bioRxiv.  
810 <https://www.biorxiv.org/content/10.1101/2022.03.29.486197v1.abstract>.
- 811 23. Hu, X., Link to external site, this link will open in a new window, Cheng, L. Y., Chiu,  
812 M. H. & Paller, K. A. Promoting memory consolidation during sleep: A meta-analysis of  
813 targeted memory reactivation. *Psychol. Bull.* **146**, 218–244 (2020).
- 814 24. Denis, D. *et al.* Sleep spindles preferentially consolidate weakly encoded memories. *J.*  
815 *Neurosci.* (2021) doi:10.1523/JNEUROSCI.0818-20.2021.
- 816 25. Oyarzún, J. P., Morís, J., Luque, D., Diego-Balaguer, R. de & Fuentemilla, L. Targeted  
817 Memory Reactivation during Sleep Adaptively Promotes the Strengthening or Weakening of  
818 Overlapping Memories. *J. Neurosci.* **37**, 7748–7758 (2017).
- 819 26. Bennion, K. A., Payne, J. D., Kensinger, E. A. & Link to external site, this link will open  
820 in a new window. The impact of napping on memory for future-relevant stimuli: Prioritization  
821 among multiple salience cues. *Behav. Neurosci.* **130**, 281–289 (2016).

- 822 27. Alger, S. E., Kensinger, E. A. & Payne, J. D. Preferential consolidation of emotionally  
823 salient information during a nap is preserved in middle age. *Neurobiol. Aging* **68**, 34–47 (2018).
- 824 28. Tamaki, M. *et al.* Reward does not facilitate visual perceptual learning until sleep occurs.  
825 *Proc. Natl. Acad. Sci.* **117**, 959–968 (2020).
- 826 29. Sterpenich, V. *et al.* Reward biases spontaneous neural reactivation during sleep. *Nat.*  
827 *Commun.* **12**, 4162 (2021).
- 828 30. Kuiper, N. A. & Derry, P. A. Depressed and nondepressed content self-reference in mild  
829 depressives. *J. Pers.* **50**, 67–80 (1982).
- 830 31. Symons, C. S. & Johnson, B. T. The self-reference effect in memory: A meta-analysis.  
831 *Psychol. Bull.* **121**, 371–394 (1997).
- 832 32. Auerbach, R. P. *et al.* Self-referential processing in adolescents: Stability of behavioral  
833 and ERP markers. *Psychophysiology* **53**, 1398–1406 (2016).
- 834 33. Disner, S. G., Shumake, J. D. & Beevers, C. G. Self-referential schemas and attentional  
835 bias predict severity and naturalistic course of depression symptoms. *Cogn. Emot.* **31**, 632–644  
836 (2017).
- 837 34. Konovalov, A. & Krajbich, I. Revealed strength of preference: Inference from response  
838 times. *Judgm. Decis. Mak.* **14**, 381–394 (2019).
- 839 35. Allen, M. *et al.* Raincloud plots: a multi-platform tool for robust data visualization.  
840 Preprint at <https://doi.org/10.12688/wellcomeopenres.15191.2> (2021).
- 841 36. Carbone, J. *et al.* The effect of zolpidem on targeted memory reactivation during sleep.  
842 *Learn. Mem.* **28**, 307–318 (2021).



- 843 37. Rakowska, M., Abdellahi, M. E. A., Bagrowska, P., Navarrete, M. & Lewis, P. A. Long  
844 term effects of cueing procedural memory reactivation during NREM sleep. *NeuroImage* **244**,  
845 118573 (2021).
- 846 38. Schreiner, T., Petzka, M., Staudigl, T. & Staresina, B. P. Endogenous memory  
847 reactivation during sleep in humans is clocked by slow oscillation-spindle complexes. *Nat.*  
848 *Commun.* **12**, 3112 (2021).
- 849 39. Cairney, S. A., Guttesen, A. á V., El Marj, N. & Staresina, B. P. Memory Consolidation  
850 Is Linked to Spindle-Mediated Information Processing during Sleep. *Curr. Biol.* **28**, 948-954.e4  
851 (2018).
- 852 40. Fogel, S. M. & Smith, C. T. The function of the sleep spindle: A physiological index of  
853 intelligence and a mechanism for sleep-dependent memory consolidation. *Neurosci. Biobehav.*  
854 *Rev.* **35**, 1154–1165 (2011).
- 855 41. Kuula, L. *et al.* Higher sleep spindle activity is associated with fewer false memories in  
856 adolescent girls. *Neurobiol. Learn. Mem.* **157**, 96–105 (2019).
- 857 42. Antony, J. W. *et al.* Sleep Spindle Refractoriness Segregates Periods of Memory  
858 Reactivation. *Curr. Biol.* **28**, 1736-1743.e4 (2018).
- 859 43. Lewis, P. A. & Bendor, D. How Targeted Memory Reactivation Promotes the Selective  
860 Strengthening of Memories in Sleep. *Curr. Biol.* **29**, R906–R912 (2019).
- 861 44. Schechtman, E. *et al.* Multiple memories can be simultaneously reactivated during sleep  
862 as effectively as a single memory. *Commun. Biol.* **4**, 1–13 (2021).

- 863 45. Antony, J. W. *et al.* Sleep Spindle Refractoriness Segregates Periods of Memory  
864 Reactivation. *Curr. Biol.* **28**, 1736-1743.e4 (2018).
- 865 46. Drosopoulos, S., Schulze, C., Fischer, S. & Born, J. Sleep's function in the spontaneous  
866 recovery and consolidation of memories. *J. Exp. Psychol. Gen.* **136**, 169–183 (2007).
- 867 47. Petzka, M., Charest, I., Balanos, G. M. & Staresina, B. P. Does sleep-dependent  
868 consolidation favour weak memories? *Cortex* **134**, 65–75 (2021).
- 869 48. Antony, J. W., Cheng, L. Y., Brooks, P. P., Paller, K. A. & Norman, K. A. Competitive  
870 learning modulates memory consolidation during sleep. *Neurobiol. Learn. Mem.* **155**, 216–230  
871 (2018).
- 872 49. Emotional arousal modulates oscillatory correlates of targeted memory reactivation  
873 during NREM, but not REM sleep | Scientific Reports.  
874 <https://www.nature.com/articles/srep39229>.
- 875 50. Fernandez, L. M. J. & Lüthi, A. Sleep Spindles: Mechanisms and Functions. *Physiol.*  
876 *Rev.* **100**, 805–868 (2020).
- 877 51. Beck, J., Loretz, E. & Rasch, B. Exposure to relaxing words during sleep promotes slow-  
878 wave sleep and subjective sleep quality. *Sleep* **44**, zsab148 (2021).
- 879 52. Hutchison, I. C. *et al.* Targeted memory reactivation in REM but not SWS selectively  
880 reduces arousal responses. *Commun. Biol.* **4**, 1–6 (2021).
- 881 53. Batterink, L. J., Westerberg, C. E. & Paller, K. A. Vocabulary learning benefits from  
882 REM after slow-wave sleep. *Neurobiol. Learn. Mem.* **144**, 102–113 (2017).

- 883 54. Rosenberg, M. Society and the adolescent self-image. in (Princeton, NJ: Princeton  
884 University Press, 1965).
- 885 55. Raskin, R. & Hall, C. S. The Narcissistic Personality Inventory: Alternative Form  
886 Reliability and Further Evidence of Construct Validity. *J. Pers. Assess.* **45**, 159 (1981).
- 887 56. John, O. P., Donahue, E. M. & Kentle, R. L. The Big Five Inventory—Versions 4a and  
888 54. in vol. 10 (Berkeley, CA: University of California, Berkeley, Institute of Personality and  
889 Social Research, 1991).
- 890 57. Beck, A. T., Steer, R. A., Ball, R. & Ranieri, W. F. Comparison of Beck Depression  
891 Inventories-IA and-II in Psychiatric Outpatients. *J. Pers. Assess.* **67**, 588–597 (1996).
- 892 58. Spielberger, C. D. State-Trait Anxiety Inventory, Form Y (STAI). in (Palo Alto, CA:  
893 Consulting Psychologicals Press, 1983).
- 894 59. Patton, J. H., Stanford, M. S. & Barratt, E. S. Factor structure of the Barratt  
895 Impulsiveness Scale. *J. Clin. Psychol.* **51**, 768–774 (1995).
- 896 60. R Core Team (2020). R: a language and environment for statistical computing. R  
897 Foundation for Statistical Computing.
- 898 61. Lenth, R. V. *et al.* emmeans: Estimated Marginal Means, aka Least-Squares Means.  
899 (2022).
- 900 62. Delorme, A. & Makeig, S. EEGLAB: an open source toolbox for analysis of single-trial  
901 EEG dynamics including independent component analysis. *J. Neurosci. Methods* **134**, 9–21  
902 (2004).

- 903 63. Vallat, R. & Walker, M. P. An open-source, high-performance tool for automated sleep  
904 staging. *eLife* **10**, e70092 (2021).
- 905 64. Oostenveld, R., Fries, P., Maris, E. & Schoffelen, J.-M. FieldTrip: Open Source Software  
906 for Advanced Analysis of MEG, EEG, and Invasive Electrophysiological Data. *Comput. Intell.*  
907 *Neurosci.* **2011**, 1–9 (2011).
- 908 65. Schechtman, E. *et al.* Sleep reactivation did not boost suppression-induced forgetting.  
909 *Sci. Rep.* **11**, 1383 (2021).
- 910 66. Maris, E. & Oostenveld, R. Nonparametric statistical testing of EEG- and MEG-data. *J.*  
911 *Neurosci. Methods* **164**, 177–190 (2007).

912

### 913 **Acknowledgements**

914 This research was supported by the National Natural Science Foundation of China (No.  
915 31922089, No.32171056) and General Research Fund (No. 17601318) of Hong Kong Research  
916 Grants Council to X.H.

### 917 **Author contributions**

918 Ziqing Yao: Conceptualization, Methodology, Data curation, Writing- Original draft preparation.  
919 Software, Project administration. Tao Xia: Writing - Review & Editing, Visualization. Zhiguo  
920 Zhang: Writing - Review & Editing. Xuanyi Lin: Writing - Review & Editing. Pengmin Qin:  
921 Writing - Review & Editing. Yina Ma: Writing - Review & Editing. Xiaoqing Hu:  
922 Conceptualization, Methodology, Writing- Original draft preparation. Writing- Reviewing and  
923 Editing, Funding acquisition, Resources, Supervision.

924 **Conflict of interest statement**

925 None
